# Supplementary material
Source: MDPI journal article supplement (https://www.mdpi.com/2073-4395/13/7/1955)
Supplement: s1 [file s1]

**Table S1.** The list of spring durum wheat material included in the study.

| Study Entry #                                           | KASIB Entry # | Variety/Line                  | KASIB years | Pedigree                                                                                                                                   |
|---------------------------------------------------------|---------------|-------------------------------|-------------|--------------------------------------------------------------------------------------------------------------------------------------------|
| <b>Aktobe Agricultural Experimental Station (KZ)</b>    |               |                               |             |                                                                                                                                            |
| 28                                                      | 2-18          | Kargala_18                    | 2001-02     |                                                                                                                                            |
| 30                                                      | 2-20          | 383-MC                        | 2001-02     |                                                                                                                                            |
| 31                                                      | 2-21          | 452-MC                        | 2001-02     |                                                                                                                                            |
| 40                                                      | 5-1           | Kargala 24                    | 2005-06     |                                                                                                                                            |
| 41                                                      | 5-2           | Kargala 447                   | 2005-06     |                                                                                                                                            |
| 42                                                      | 5-3           | Kargala 303                   | 2005-06     |                                                                                                                                            |
| 50                                                      | 6-1           | Kargala 1514-06               | 2007-08     |                                                                                                                                            |
| 61                                                      | 7-1           | Kargala 69                    | 2009-10     | 16256//Orenburgskaya 10/Aktubinskaya 78/3/Kargala 9                                                                                        |
| 62                                                      | 7-2           | Kargala 1538                  | 2009-10     | Orenburgskaya-10/Kargala-471                                                                                                               |
| 63                                                      | 7-3           | Kargala 1540                  | 2009-10     | Aktubinskaya 75 /Kargala 9 // Kargala 34                                                                                                   |
| 73                                                      | 8-2           | Kargala 1539                  | 2011-12     | Hordeiforme-91-144-4/Kargala-9                                                                                                             |
| 74                                                      | 8-3           | Kargala 1671                  | 2011-12     | K-45675/Omskii-rubin//Kargala-1                                                                                                            |
| 89                                                      | 9-1           | Kargala 1408                  | 2013-14     | Orenburgskaya 10/Kargala 471                                                                                                               |
| 102                                                     | 10-1          | Kargala 66                    | 2015-16     | Line 17052 // Orenburgskaya 10 / Rodonit                                                                                                   |
| 103                                                     | 10-3          | Kargala 1514                  | 2015-16     | Bogarnaya 56 // Celinnaya 26, Nem-0,015% // Lakota /3/ Line 3940                                                                           |
| 122                                                     | 11-2          | Kargala 228                   | 2017-18     | Line 1358 / Kargala 69                                                                                                                     |
| 123                                                     | 11-3          | Kargala 238                   | 2017-18     | Hordeyforme 379 / Zhemchuzhina Sibiri//Kargala 71                                                                                          |
| 143                                                     | 12-1          | Line P-1409                   | 2019-20     | Kargala 12/ Kargala 26                                                                                                                     |
| 144                                                     | 12-2          | Soyana                        | 2019-20     | Svetlana/Angara                                                                                                                            |
| 145                                                     | 12-3          | Yantarnaya 60                 | 2019-20     | Timiryazevskaya stepnaya/ Kargala 71                                                                                                       |
| <b>Karabalyk Agricultural Experimental Station (KZ)</b> |               |                               |             |                                                                                                                                            |
| 1                                                       | 1-1           | Kostanayskaya_30              | 2000        | G-2684 individual selection                                                                                                                |
| 2                                                       | 1-2           | Kostanayskaya_1               | 2000        | Kostanaiskaya                                                                                                                              |
| 3                                                       | 1-3           | Orenburgskaya_2               | 2000        | Kharkovskaya-46/Bezenchukskaya-105                                                                                                         |
| 6                                                       | 1-9           | Line_160.93                   | 2000        | G-2897 /Kubanskaya 24                                                                                                                      |
| 7                                                       | 1-10          | Line_362.91                   | 2000        | G-2723 / Kostanayskaya 14                                                                                                                  |
| 19                                                      | 2-2           | Gordeiforme 430-88            | 2001-02     | G-3686/G-255-76                                                                                                                            |
| 20                                                      | 2-4           | Gordeiforme 59-92             | 2001-02     | K-37087/SID 88                                                                                                                             |
| 21                                                      | 2-5           | Gordeiforme 207-92            | 2001-02     | G-471/88// Kharkovskaya 46                                                                                                                 |
| 22                                                      | 2-6           | Gordeiforme 362-91            | 2001-02     | G-2723/Kostanayskaya 14                                                                                                                    |
| 23                                                      | 2-7           | Gordeiforme 242-93            | 2001-02     | I-395926/Orenburgskaya 10                                                                                                                  |
| 24                                                      | 2-8           | Gordeiforme 127-89            | 2001-02     | Kostanayskaya 1 - individual selection                                                                                                     |
| 38                                                      | 4-10          | Kostanayskaya 12              | 2003-04     | (S)Kustanaiskaya-1[3012];                                                                                                                  |
| 39                                                      | 4-11          | Asangali                      | 2003-04     | Omskii-rubin//6301/Kustanaiskaya-14                                                                                                        |
| 46                                                      | 5-8           | Karabalykskaya chernokolosaya | 2005-06     | Bashkirskaya 23/Kubanka K-26602                                                                                                            |
| 47                                                      | 5-9           | Altyn dala (LC-2)             | 2005-06     | G-2684/Altaisakaya-niva//Kustanaiskaya-1[3012]; Omskii-rubin//6301/Kustanaiskaya-14[3012]; Kharkovskaya-21/Saratovskaya-zolotistaya[3012]; |

|                                                                                   |      |                         |         |                                                                                                                                                 |
|-----------------------------------------------------------------------------------|------|-------------------------|---------|-------------------------------------------------------------------------------------------------------------------------------------------------|
| 53                                                                                | 6-4  | Altyn shygys            | 2007-08 | G-2684/Altayskaya niva//Kostanayskaya 1                                                                                                         |
| 54                                                                                | 6-5  | Altyn dala              | 2007-08 | G-2684/Altaiskaya-niva//Kustanaiskaya-1[3012];<br>Omskii-rubin//6301/Kustanaiskaya-14[3012];<br>Kharkovskaya-21/Saratovskaya-zolotistaya[3012]; |
| 64                                                                                | 7-4  | Kostanayskaya 10        | 2009-10 | Kharkovskaya 46/Leucurum 21-50-63//Line 182-3078                                                                                                |
| 65                                                                                | 7-5  | Bolashak                | 2009-10 | Saratovskaya zolotistaya / Leucurum 86-89//Line 3045                                                                                            |
| 75                                                                                | 8-4  | Gordeiforme 113-01      | 2011-12 | Saratovskaya-zolotistaya//Kharkovskaya-46/Omskii-rubin[4146];                                                                                   |
| 90                                                                                | 9-4  | Line G1549              | 2013-14 | 618-89/205-15254                                                                                                                                |
| 91                                                                                | 9-5  | Line G1612              | 2013-14 | Kustanayskaya 1/Hordeiforme 53                                                                                                                  |
| 104                                                                               | 10-4 | Sharifa                 | 2015-16 | Hordeyforme 218 / Kostanayskaya 1                                                                                                               |
| 128                                                                               | 11-8 | Gordeiforme 2264        | 2017-18 | Gordeyforme 1730 / KazRIAPG sample                                                                                                              |
| 150                                                                               | 12-8 | Kostanayskaya 15        | 2019-20 | Sid-88/Ametist                                                                                                                                  |
| 151                                                                               | 12-9 | Gordeiforme 1790        | 2019-20 | G-132-53874 /G-182-3078                                                                                                                         |
| <b>Kazakh Grain Research Institute (KZ)</b>                                       |      |                         |         |                                                                                                                                                 |
| 37                                                                                | 4-8  | Damsinskaya yantarnaya  | 2003-04 | Damsinskaya-90(TR.DR)/(TR.AE)Saratovskaya-210[2969][4163];                                                                                      |
| 77                                                                                | 8-6  | Korona                  | 2011-12 | Kharkovskaya-17/Altaika[3012][4146][4163];                                                                                                      |
| 78                                                                                | 8-7  | Durum 2                 | 2011-12 | Yavaros-79/M-3128[4146];                                                                                                                        |
| 79                                                                                | 8-8  | Durum 49                | 2011-12 | CMH-73-A(CIMMYT)/(93-90-1)Orenburgskaya-2/Maliani-76[4146];                                                                                     |
| 92                                                                                | 9-6  | Line e 145-z            | 2013-14 | Kubanka/Hordeiforme 177                                                                                                                         |
| 93                                                                                | 9-7  | Line 54-02-2l           | 2013-14 | Leucurum 6953/L.103                                                                                                                             |
| 94                                                                                | 9-8  | Line e147-z             | 2013-14 | Hordeiforme 315-5/Akmolinka 5                                                                                                                   |
| 105                                                                               | 10-6 | Lavina                  | 2015-16 | 118-86-1, κ-48235 / Angara // Celinogradskaya 85                                                                                                |
| 106                                                                               | 10-7 | Damsinskaya yubileynaya | 2015-16 | Cocorit 71 / Saratovskaya 29                                                                                                                    |
| 107                                                                               | 10-8 | Shortandinskaya 256     | 2015-16 | κ-59091, Atherapitico / celinogradskaya 85                                                                                                      |
| 126                                                                               | 11-6 | Gordeiforme 69-08-2     | 2017-18 | Corona /144-00-2 local line                                                                                                                     |
| 127                                                                               | 11-7 | Gordeiforme 178-05-2    | 2017-18 | Saratovskaya 57 / Zhemchuzhina sibiri                                                                                                           |
| 148                                                                               | 12-6 | Line 69-08-2            | 2019-20 | Corona/ 144-00-2                                                                                                                                |
| 149                                                                               | 12-7 | Line 250-06-14          | 2019-20 | Altayskaya niva/ Kostanayskaya 1477                                                                                                             |
| <b>Kazakh Scientific Research Institute of Agriculture and Plant Growing (KZ)</b> |      |                         |         |                                                                                                                                                 |
| 8                                                                                 | 1-12 | Line 6801-34-6          | 2000    | -                                                                                                                                               |
| 9                                                                                 | 1-13 | Line 654-1-2-3-4        | 2000    |                                                                                                                                                 |
| 10                                                                                | 1-14 | Line 17950              | 2000    |                                                                                                                                                 |
| 11                                                                                | 1-15 | Line 17590              | 2000    |                                                                                                                                                 |
| 12                                                                                | 1-17 | Line 18053              | 2000    |                                                                                                                                                 |
| 13                                                                                | 1-18 | Line 18022-1            | 2000    |                                                                                                                                                 |
| 43                                                                                | 5-5  | Nauryz 8                | 2005-06 |                                                                                                                                                 |
| 44                                                                                | 5-6  | Toma                    | 2005-06 |                                                                                                                                                 |
| 45                                                                                | 5-7  | Seymur                  | 2005-06 | Altayskaya niva/ Hordeyforme 254                                                                                                                |
| 172                                                                               | 6-6  | Nauryz 6 (LC-1)         | 2007-08 | Orenburgskaya-10/Kharkovskaya-46[3012][3931];<br>(S)18018-KIZ[3645];                                                                            |
| 56                                                                                | 6-7  | Lan                     | 2007-08 | Orenburgskaya-10/Saratovskaya-40//Omskii-                                                                                                       |

|                                                   |       |                                |         |                                                                                                                                                         |
|---------------------------------------------------|-------|--------------------------------|---------|---------------------------------------------------------------------------------------------------------------------------------------------------------|
|                                                   |       |                                |         | rubin[3931];                                                                                                                                            |
| 68                                                | 7-7   | Ertol                          | 2009-10 | Line 49270 / Line 44422                                                                                                                                 |
| 87                                                | 8-20  | Line 18485-2                   | 2011-12 |                                                                                                                                                         |
| 88                                                | 8-21  | Line 18404                     | 2011-12 | 58741/Orenburgskaya-10[4146];                                                                                                                           |
| 100                                               | 9-9   | Line 18987                     | 2013-14 | 58266/Orenburgskaya 10                                                                                                                                  |
| 95                                                | 9-10  | Line 18472-3-2                 | 2013-14 | Opushennaya steblevaya/Aktyub. 74                                                                                                                       |
| 108                                               | 10-9  | Gordeiforme 18567-6            | 2015-16 | 58266 / Orenburgskaya 10                                                                                                                                |
| 109                                               | 10-10 | Gordeiforme 18585-2            | 2015-16 | Melyanopus 26 / SID 88                                                                                                                                  |
| 124                                               | 11-4  | Line 19003                     | 2017-18 | 58266 / Orenburgskaya 10                                                                                                                                |
| 125                                               | 11-5  | Line 19029                     | 2017-18 | 39781 / 15090                                                                                                                                           |
| 146                                               | 12-4  | Seymur 17                      | 2019-20 | Altayskaya niva/ Hordeyforme 254                                                                                                                        |
| 147                                               | 12-5  | Serke                          | 2019-20 | Bashkirsкая 21/Odesskaya 116                                                                                                                            |
| 167                                               | CVT-1 | 19055/Gordeiforme              | 2019-20 |                                                                                                                                                         |
| 166                                               | CVT-2 | Line_18093-7-2                 | 2019-20 |                                                                                                                                                         |
| 168                                               | CVT-3 | Line_18924                     | 2019-20 |                                                                                                                                                         |
| 169                                               | CVT-4 | Line_19029                     | 2019-20 | 39781 / 15090                                                                                                                                           |
| <b>Altay Agricultural Research Institute (RU)</b> |       |                                |         |                                                                                                                                                         |
| 34                                                | 4-5   | Altayskaya Niva                | 2003-04 | Kharkovskaya-51/P-274//P-274/3/Kharkovskaya-46[302][2913];                                                                                              |
| 35                                                | 4-6   | Gordeiforme 415                | 2003-04 | Orenburgskaya 10/SID 88                                                                                                                                 |
| 36                                                | 4-7   | Gordeiforme 417 (Salut Altaya) | 2003-04 | Novodonskaya / Zarnica Altaya                                                                                                                           |
| 48                                                | 5-12  | Gordeiforme 426                | 2005-06 | Aya//Line 6 / G291                                                                                                                                      |
| 57                                                | 6-13  | Gordeiforme 553                | 2007-08 | Hordeyforme 350 / Hordeyforme 283                                                                                                                       |
| 69                                                | 7-12  | Altayskiy yantar               | 2009-10 | Hordeiforme-728/Altayskaya-niva//Hordeiforme-728/Orenburgskaya-10[2913][2971]; Hordeiforme-828/Altayskaya-niva//Hordeiforme-121/Orenburgskaya-10[1359]; |
| 70                                                | 7-14  | Gordeiforme 561                | 2009-10 | Hordeyforme 369 / Altayskiy yantar                                                                                                                      |
| 80                                                | 8-12  | Gordeiforme 573                | 2011-12 | Angel/Hordeiforme-328[4146];                                                                                                                            |
| 81                                                | 8-13  | Gordeiforme 616                | 2011-12 | Hordeiforme-382/Durabon[4146];                                                                                                                          |
| 96                                                | 9-14  | Gordeiforme 587                | 2013-14 | Aleyskaya / Hordeiforme 325                                                                                                                             |
| 97                                                | 9-15  | Gordeiforme 627                | 2013-14 | Bezenchukskaya stepnaya / Hordeiforme 1692                                                                                                              |
| 98                                                | 9-16  | Gordeiforme 628                | 2013-14 | Hordeiforme 415 / L.1675                                                                                                                                |
| 110                                               | 10-14 | Gordeiforme 719                | 2015-16 | Hordeyforme 423 / Omskiy Korund                                                                                                                         |
| 111                                               | 10-16 | Gordeiforme 748                | 2015-16 | Hordeyforme 415 / Bezenchukskaya stepnaya                                                                                                               |
| 131                                               | 11-15 | Gordeiforme 829                | 2017-18 | Pamyati Yanchenko / Pamyati Chekhovicha                                                                                                                 |
| 132                                               | 11-16 | Gordeiforme 864                | 2017-18 | Hordeyforme 474 / G1692                                                                                                                                 |
| 133                                               | 11-17 | Gordeiforme 881                | 2017-18 | Pamyati Yanchenko / Pamyati Chekhovicha                                                                                                                 |
| 153                                               | 12-15 | Gordeiforme 895                | 2019-20 | G440 / Omskiy Korund                                                                                                                                    |
| 154                                               | 12-16 | Gordeiforme 910                | 2019-20 | Omskaya stepnaya / 1TD-1                                                                                                                                |
| 155                                               | 12-17 | Gordeiforme 924                | 2019-20 | Daonskaya elegiya/ Oazis                                                                                                                                |
| <b>Omsk Agricultural Research Center (RU)</b>     |       |                                |         |                                                                                                                                                         |
| 14                                                | 1-19  | Angel                          | 2000    | Atlant/Atlant-14[1359][1369];                                                                                                                           |

|                                                    |       |                                              |         |                                                                                                                                                         |
|----------------------------------------------------|-------|----------------------------------------------|---------|---------------------------------------------------------------------------------------------------------------------------------------------------------|
| 15                                                 | 1-20  | Ametist                                      | 2000    | Hordeiforme-6673/Omskii-rubin//Hordeiforme-7008/Hordeiforme-440-79[1929];                                                                               |
| 16                                                 | 1-21  | Omskaya_Yantarnaya                           | 2000    | Svetlana/Kharkovskaya-46//Hordeiforme-10/K-5173[3012]; Hordeiforme-ek-27-1-1/Hordeiforme-zl-35-2[1359][1929];                                           |
| 17                                                 | 1-22  | Omskiy_Rubin                                 | 2000    | Almaz/Kharkovskaya-46//Kharkovskaya-46/Hordeiforme-10/3/wells[302][1001][2913]; Almaz/Kharkovskaya-46/3/Kharkovskaya-46/Hordeiforme-10//wells[1155];    |
| 18                                                 | 1-23  | Omskiy_korund                                | 2000    | Angel/(k-47117)Tehuacan-67[1359];                                                                                                                       |
| 25                                                 | 2-9   | Gordeiforme 94-71                            | 2001-02 | Hordeyforme ZL 41-4/ Hordeyforme ZL 4-13                                                                                                                |
| 26                                                 | 2-10  | Gordeiforme 91-102-6                         | 2001-02 | Hordeyforme ZK 35-2/ Hordeyforme ZL 35-2                                                                                                                |
| 27                                                 | 2-11  | Gordeiforme 91-22-2                          | 2001-02 | Hordeyforme VJ 45-5/ Hordeyforme ZL 35-2                                                                                                                |
| 32                                                 | 4-3   | Zhemchuzhina Sibiri                          | 2003-04 | Antei/Leucurum-6953//Almaz/Omskii-rubin/3/Svetlana[1359];                                                                                               |
| 33                                                 | 4-4   | Gordeiforme 91-144-4                         | 2003-04 | Hordeyforme VJ 45-5/Hordeyforme ZL 35-2 / 3/ Hordeyforme VJ 45-5/2/K 47117)                                                                             |
| 49                                                 | 5-16  | Gordeiforme 94-94-13                         | 2005-06 | Hordeyforme IL 54-1/ HordeyformeZL 35-2                                                                                                                 |
| 58                                                 | 6-14  | Gordeiforme 94-24-12                         | 2007-08 | Hordeyforme VJ 45-5/ Hordeyforme ZL 41-13                                                                                                               |
| 59                                                 | 6-15  | Gordeiforme 95-139-4                         | 2007-08 | Hordeyforme1131/Svetlana                                                                                                                                |
| 60                                                 | 6-16  | Omskaya Stepnaya                             | 2007-08 | Orenburgskaya-10/Omskaya-yantarnaya[1359];                                                                                                              |
| 71                                                 | 7-15  | Gordeiforme 97-49-1                          | 2009-10 | Hordeyforme IP 54-1 // Orenburgskaya 10                                                                                                                 |
| 72                                                 | 7-16  | Gordeiforme 98-42-1                          | 2009-10 | Hordeiforme-90-37-4/Hordeiforme-3-L-35-2[4146];                                                                                                         |
| 84                                                 | 8-17  | Omskiy izumrud                               | 2011-12 | Hordeiforme-94-8-5/Omskaya-yantarnaya[1359][4146];                                                                                                      |
| 86                                                 | 8-19  | Gordeiforme 00-96-8                          | 2011-12 | Hordeiforme-90-37-7/Nik[4146];                                                                                                                          |
| 101                                                | 9-21  | Omskiy Korall                                | 2013-14 | Omskaya yantarnaya// pod11/yazi1 cdss93b00069s-9m-oy-ob-1y-ob                                                                                           |
| 113                                                | 10-18 | Gordeiforme 01-115-5                         | 2015-16 | Hordeyforme 95-170-5 / Hordeyforme 95-126-1                                                                                                             |
| 134                                                | 11-18 | Gordeiforme 04-76-5                          | 2017-18 | G.98-130-6 // pod11/yazi1                                                                                                                               |
| 136                                                | 11-20 | Gordeiforme 05-42-12                         | 2017-18 | G.97-49-1/ Bezenchukskaya stepnaya                                                                                                                      |
| 156                                                | 12-18 | Gordeiforme 08-25-2                          | 2019-20 | G.01-107-5/Zhemchuzhina sibiri                                                                                                                          |
| 157                                                | 12-19 | Gordeiforme 08-67-1                          | 2019-20 | G.99-224-1/G.455                                                                                                                                        |
| 85                                                 | 13-18 | Omskiy_Cirkon                                | 2012-13 | Hordeiforme 90-37-4/Hordeiforme ZL -35-2                                                                                                                |
| 121                                                | 17-26 | Zhemchuzhina_Sibiri (LC-3)                   | 2016-17 | Antei/Leucurum-6953//Almaz/Omskii-rubin/3/Svetlana[1359];                                                                                               |
| <b>Samara Agricultural Research Institute (RU)</b> |       |                                              |         |                                                                                                                                                         |
| 82                                                 | 8-15  | Line 688 d-4 – (Bezenchukskaya 210)          | 2011-12 | Pamyati-Chekhovicha/4/Saratovskaya-zolotistaya/Hordeiforme-740//Apulicum-341/3/Kharkovskaya-9/Saratovskaya-zolotistaya//Saratovskaya-zolotistaya[4146]; |
| 83                                                 | 8-16  | Line 653 d-44 – (Bezenchukskaya zolotistaya) | 2011-12 | Pamyati Chekhovicha/ 356D-14                                                                                                                            |
| 99                                                 | 9-17  | Leucurum 1307D-51 (Bezenchukskaya krepost)   | 2013-14 | L.1751/Pamyati Chekhova                                                                                                                                 |
| 117                                                | 10-22 | Leucurum 1307D-54                            | 2015-16 | L.1751/Pamyati Chekhova                                                                                                                                 |
| 118                                                | 10-23 | Leucurum 1469D-21                            | 2015-16 | Line 495d-6 /Leucurum 1714                                                                                                                              |
| 119                                                | 10-24 | Leucurum1594D-3                              | 2015-16 | Leucurum 1752 / Marina                                                                                                                                  |

|                                                        |       |                                                     |         |                                                                                                                                                                  |
|--------------------------------------------------------|-------|-----------------------------------------------------|---------|------------------------------------------------------------------------------------------------------------------------------------------------------------------|
| 120                                                    | 10-25 | Bezenchukskaya 139                                  | 2015-16 | Kharkovskaya 46/ Bezenchukskaya 121                                                                                                                              |
| 137                                                    | 11-21 | Leucurum 1429-10                                    | 2017-18 | Icaro / B202                                                                                                                                                     |
| 138                                                    | 11-22 | Leucurum 1506-36<br>(Bezenchukskaya<br>yubileynaya) | 2017-18 | Leukurum 1714 / Pamyati Chekhovicha                                                                                                                              |
| 139                                                    | 11-23 | Gordeiforme 1591-21<br>(Triada)                     | 2017-18 | Hordeyforme 1732 / 646D-37                                                                                                                                       |
| 142                                                    | 11-26 | Leucurum 1469-21                                    | 2017-18 | Line 495d-6 /Leukurum 1714                                                                                                                                       |
| 159                                                    | 12-20 | Line 1693D-71                                       | 2019-20 | Leukurum 1687 (Bezenchukskaya zolotistaya)/<br>Hordeiforme 944// Valentina                                                                                       |
| 160                                                    | 12-22 | Line 1970D-5                                        | 2019-20 | 495D-7/Bezenchukskaya zolotistaya                                                                                                                                |
| 161                                                    | 12-23 | Line 2021D-1                                        | 2019-20 | L1753/694D-11                                                                                                                                                    |
| <b>South-East Agricultural Research Institute (RU)</b> |       |                                                     |         |                                                                                                                                                                  |
| 115                                                    | 10-20 | Elizavetinskaya                                     | 2015-16 | Saratovskaya zolotistaya / Svetlana                                                                                                                              |
| 116                                                    | 10-21 | Valentina                                           | 2015-16 | Saratovskaya 59/Leukurum 1897 / D-1973/Saratovskaya<br>zolotistaya                                                                                               |
| 140                                                    | 11-24 | Annushka                                            | 2017-18 | Saratovskaya 53/Medora//D-1995/3//Leukurum 5594.                                                                                                                 |
| 141                                                    | 11-25 | Luch 25                                             | 2017-18 | PD45 / Saratovskaya Zolotistaya /5/ Leukurum 1947 /<br>Kharkovskaya 46 /2/ Saratovskaya 59 / Kharkovskaya<br>46/3/Saratovskaya zolotistaya/4/D- 2034 /6/ D-2005. |
| 162                                                    | 12-24 | Line D-2165                                         | 2019-20 |                                                                                                                                                                  |

**Table S2.** Agronomic performance of spring durum wheat material originating from different breeding programs and tested at Almaty (2020 and 2022) and Shortandy (2021-2022).

| Originator                | Site      | Almaty | Shortandy | Aktobe | Karabalyk | Barnaul | Sam-Sar | Omsk | Average |
|---------------------------|-----------|--------|-----------|--------|-----------|---------|---------|------|---------|
| Days to heading           | Almaty    | 59.3   | 63.4      | 59.8   | 62.3      | 61.8    | 58.3    | 60.7 | 60.7    |
|                           | Shortandy | 41.8   | 46.2      | 41.1   | 44.0      | 43.7    | 40.7    | 42.7 | 42.7    |
| Plant height, cm          | Almaty    | 102    | 103       | 102    | 107       | 105     | 98      | 103  | 103.2   |
|                           | Shortandy | 69     | 74        | 71     | 76        | 74      | 68      | 71   | 71.9    |
| Spikes/plant              | Almaty    | 1.17   | 1.17      | 1.07   | 1.13      | 1.18    | 1.50    | 1.05 | 1.17    |
|                           | Shortandy | 1.52   | 1.56      | 1.44   | 1.51      | 1.51    | 1.43    | 1.53 | 1.50    |
| Spike length, cm          | Shortandy | 6.3    | 6.1       | 6.1    | 6.1       | 6.2     | 6.0     | 6.4  | 6.2     |
|                           | Almaty    | 8.5    | 9.3       | 8.6    | 8.8       | 8.8     | 8.6     | 9.3  | 8.8     |
| Awn length, cm            | Almaty    | 11.3   | 10.8      | 11.9   | 11.2      | 11.2    | 13.1    | 11.3 | 11.5    |
|                           | Shortandy | 8.6    | 9.2       | 8.7    | 8.7       | 8.8     | 9.5     | 8.9  | 8.9     |
| Spikelets/spike           | Almaty    | 18.1   | 20.5      | 18.0   | 19.6      | 18.5    | 18.5    | 19.2 | 18.8    |
|                           | Shortandy | 12.1   | 12.5      | 11.8   | 12.6      | 11.8    | 11.2    | 12.4 | 12.1    |
| Grains/spike              | Almaty    | 50.1   | 53.1      | 49.3   | 50.2      | 48.4    | 49.2    | 50.3 | 49.9    |
|                           | Shortandy | 25.0   | 23.6      | 24.6   | 25.5      | 23.7    | 22.7    | 25.5 | 24.6    |
| Grains/spikelet           | Almaty    | 2.76   | 2.59      | 2.75   | 2.57      | 2.63    | 2.67    | 2.64 | 2.66    |
|                           | Shortandy | 2.07   | 1.89      | 2.09   | 2.03      | 2.00    | 2.01    | 2.06 | 2.03    |
| 1000 kernel weight, g     | Almaty    | 38.6   | 37.0      | 42.0   | 37.6      | 41.2    | 42.4    | 38.7 | 39.8    |
|                           | Shortandy | 43.1   | 43.3      | 45.1   | 42.5      | 45.1    | 46.9    | 42.8 | 44.1    |
| Grain weight per spike, g | Almaty    | 2.01   | 2.06      | 2.16   | 1.98      | 2.10    | 2.19    | 2.05 | 2.07    |
|                           | Shortandy | 1.13   | 1.16      | 1.17   | 1.12      | 1.15    | 1.15    | 1.15 | 1.15    |
| Yield, g/m <sup>2</sup>   | Almaty    | 241    | 253       | 244    | 229       | 237     | 223     | 267  | 243     |
|                           | Shortandy | 158    | 161       | 176    | 178       | 168     | 156     | 182  | 170     |
